# Supplementary material for: Field Tests of Three Alternative Insecticides with Protein Bait for the Development of an Insecticide Rotation Program to Control Melon Flies, Zeugodacus cucurbitae (Coquillett) (Diptera: Tephritidae)
Source: MDPI journal article supplement (doi:10.3390/insects13070629), 2022-07-14
Supplement: s1 [file s1]

**Table S1.** Total number of *Zeugodacus cucurbitae*, including females (F) and males (M), caught weekly in each trap during the insecticide rotation trial on the Maui commercial farm. The dates refer to the date that traps were collected and counted; the insecticide was applied one week prior to the trap count date.

| Trap count date | Insecticide treatment the week prior to trap count | Control Area |     |     |        |     |     | Treated Area |      |      |        |      |      |        |     |      |
|-----------------|----------------------------------------------------|--------------|-----|-----|--------|-----|-----|--------------|------|------|--------|------|------|--------|-----|------|
|                 |                                                    | Trap 1       |     |     | Trap 2 |     |     | Trap 3       |      |      | Trap 4 |      |      | Trap 5 |     |      |
|                 |                                                    | Total        | F   | M   | Total  | F   | M   | Total        | F    | M    | Total  | F    | M    | Total  | F   | M    |
| 04/29/2021      | Pre-treatment                                      | 409          | 225 | 184 | -      | -   | -   | 2388         | 1114 | 1274 | 5060   | 2760 | 2300 | 1215   | 660 | 555  |
| 05/06/2021      | GF-120                                             | 713          | 399 | 314 | 274    | 164 | 110 | 199          | 82   | 117  | 879    | 404  | 475  | 771    | 293 | 478  |
| 05/13/2021      | GF-120                                             | 714          | 357 | 357 | 889    | 587 | 302 | 57           | 25   | 32   | 1532   | 552  | 980  | 172    | 69  | 103  |
| 05/20/2021      | Agri-Mek SC                                        | 644          | 303 | 341 | 1455   | 757 | 698 | 31           | 13   | 18   | 1249   | 487  | 762  | 105    | 38  | 67   |
| 05/27/2021      | Agri-Mek SC                                        | 298          | 182 | 116 | 637    | 420 | 217 | 26           | 16   | 10   | 1389   | 722  | 667  | 140    | 66  | 74   |
| 06/03/2021      | Mustang Maxx                                       | 243          | 139 | 104 | 345    | 252 | 93  | 128          | 75   | 53   | 1179   | 733  | 446  | 218    | 103 | 115  |
| 06/10/2021      | Mustang Maxx                                       | 230          | 159 | 71  | 132    | 98  | 34  | 21           | 2    | 19   | 1124   | 495  | 629  | 408    | 126 | 282  |
| 06/17/2021      | Malathion 5EC                                      | 255          | 138 | 117 | 37     | 33  | 4   | 28           | 16   | 12   | 944    | 453  | 491  | 529    | 100 | 429  |
| 06/24/2021      | Malathion 5EC                                      | 352          | 253 | 99  | 25     | 18  | 7   | 61           | 37   | 24   | 1237   | 730  | 507  | 402    | 117 | 285  |
| 07/01/2021      | GF-120                                             | 330          | 132 | 198 | 148    | 76  | 72  | 187          | 99   | 88   | 1206   | 579  | 627  | 333    | 77  | 256  |
| 07/08/2021      | GF-120                                             | 928          | 418 | 510 | 233    | 163 | 70  | 448          | 139  | 309  | 714    | 236  | 478  | 540    | 232 | 308  |
| 07/15/2021      | Agri-Mek SC                                        | 412          | 239 | 173 | 97     | 47  | 50  | 315          | 145  | 170  | 872    | 305  | 567  | 1201   | 192 | 1009 |
| 07/22/2021      | Agri-Mek SC                                        | 314          | 210 | 104 | 90     | 65  | 25  | 266          | 146  | 120  | 555    | 322  | 233  | 2029   | 467 | 1562 |
| 07/29/2021      | No treatment                                       | 880          | 607 | 273 | 187    | 133 | 54  | 479          | 280  | 199  | 380    | 232  | 148  | 1293   | 272 | 1021 |
| 08/05/2021      | No treatment                                       | 645          | 413 | 232 | 181    | 145 | 36  | 278          | 164  | 114  | 250    | 158  | 92   | 779    | 280 | 499  |
